# Supplementary material
Source: MDPI journal article supplement (https://www.mdpi.com/2071-1050/14/3/1132)
Supplement: s1 [file s1 › sustainability-1503686-supplementary.pdf]

**Supplementary material of the manuscript**  
**“Cesium 133 accumulation by freshwater macrophytes: partitioning of translocated ions**  
**and enzyme activity in plants and microorganisms”**

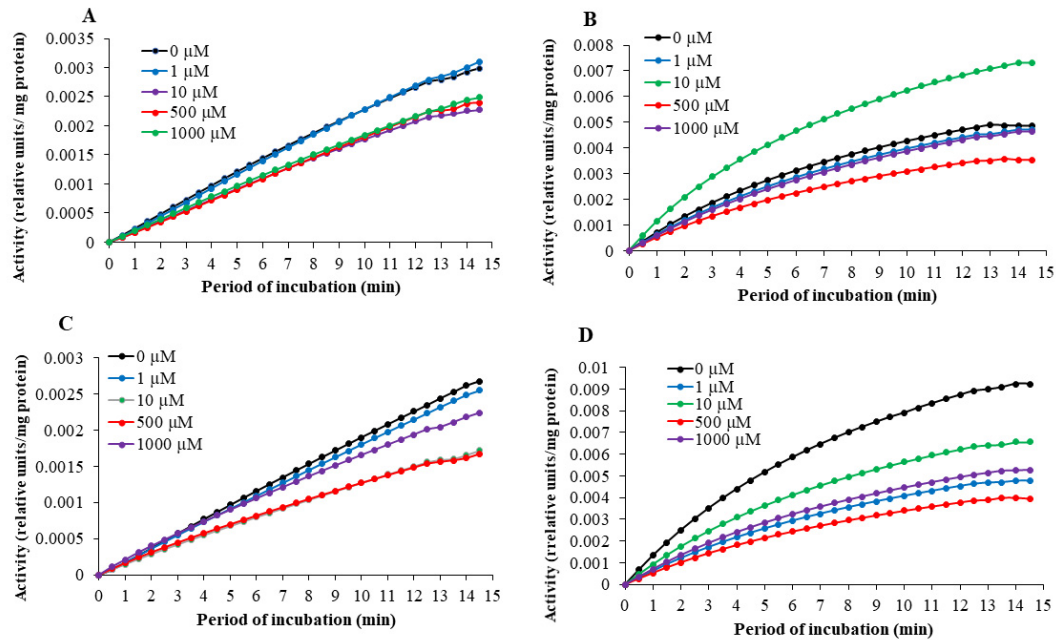

**Figure S1.** Dopaquinone and 3-methyl-2-benzothiazoninone hydrazine (DOPA+MBTH) activity of crude plant (A – *B. amplexicaulis*, B – *E. densa*, C – *C. submersum*, D – *L. laevigantum*) extracts after plant incubation with 0 to 1000 μmol/L (μM) of CsCl for 10 days.

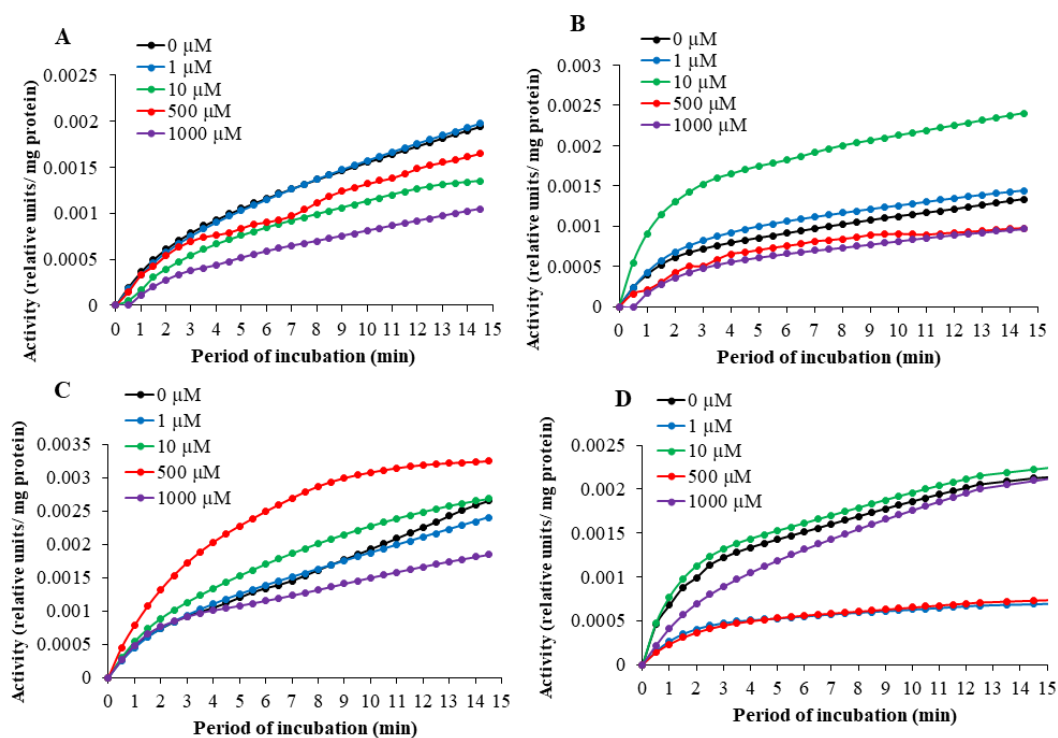

**Figure S2.** Peroxidase activity of crude plant (A – *B. amplexicaulis*, B – *E. densa*, C – *C. submersum*, D – *L. laevigantum*) extracts after plant incubation with 0 to 1000  $\mu\text{mol/L}$  ( $\mu\text{M}$ ) of CsCl for 10 days.

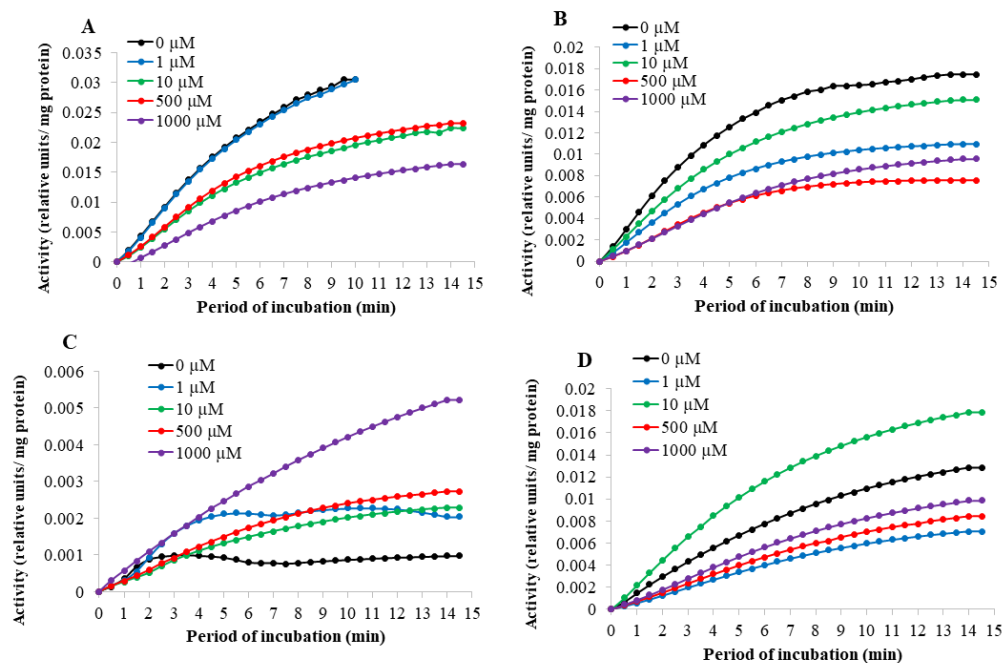

**Figure S3.** Guaiacol peroxidase activity of crude plant (A – *B. amplexicaulis*, B – *E. densa*, C – *C. submersum*, D – *L. laevigantum*) extracts after plant incubation with 0 to 1000  $\mu\text{mol/L}$  ( $\mu\text{M}$ ) of CsCl for 10 days.

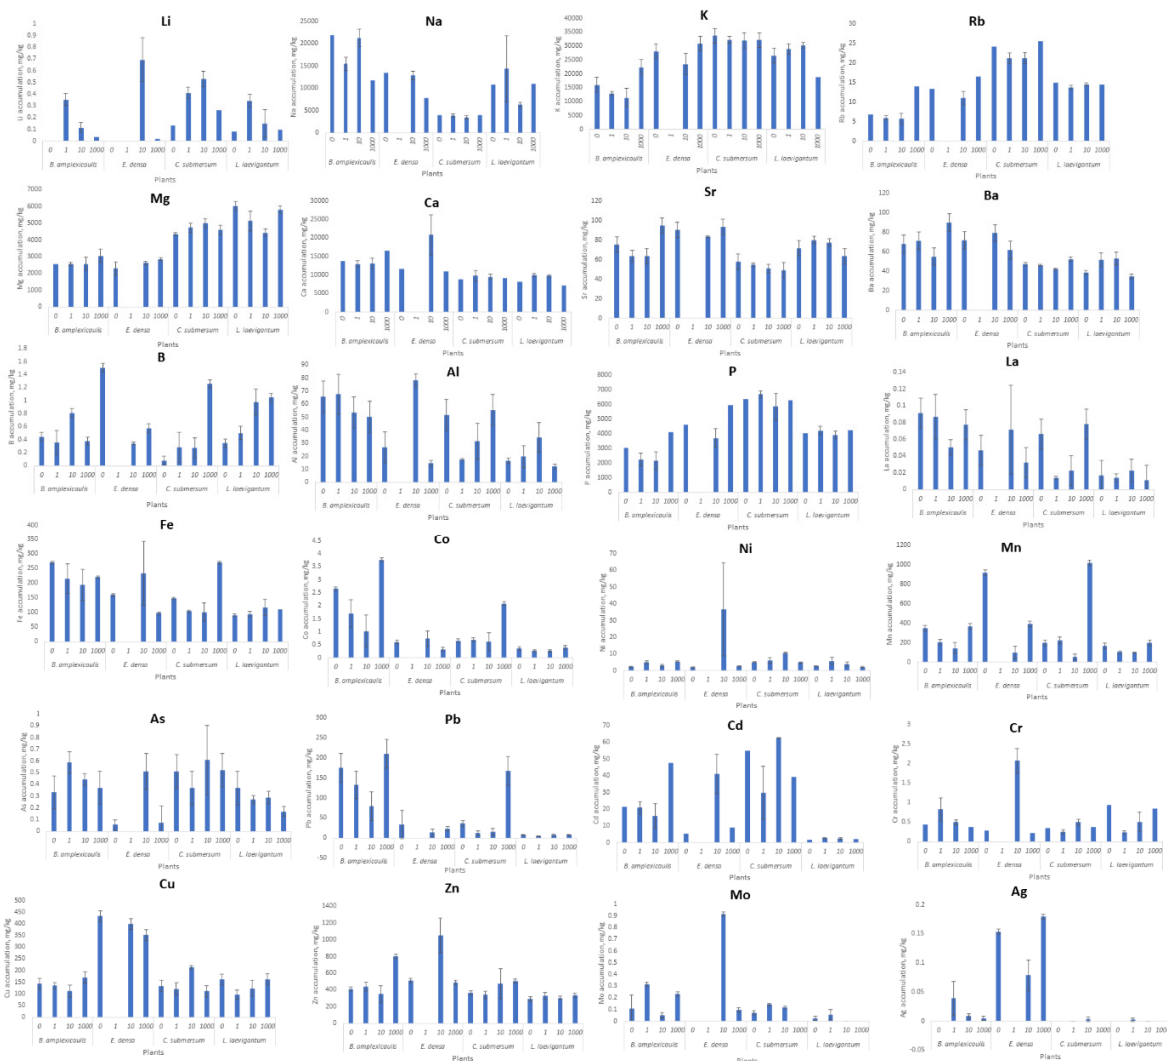

**Figure S4.** Accumulation of different elements in plant (*B. amplexicaulis*, *E. densa*, *C. submersum*, and *L. laevigantum*) biomass after the 10-day incubation in the presence of 0 μM; 1 μM; 10 μM and 1000 μM of CsCl.
